# Supplementary material for: Comparative genomics of 40 Weissella paramesenteroides strains
Source: Front Microbiol. 2023 Mar 31;14:1128028. doi: 10.3389/fmicb.2023.1128028 (PMC10102382; doi:10.3389/fmicb.2023.1128028)
Supplement: Supplementary file 1 [file Data_Sheet_1.xlsx]

## Sheet: Sheet1
Supplementary Datasheet 1. Script for converting GFF files to GFF3 files.
INDEX=$(ls *.fna | cut -d '.' -f1)
for STRAIN in ${INDEX};
do
NAME=$STRAIN;
echo -e "\e[7mProcessing sample $NAME: Weissella paramesenteroides ${NAME}...\e[27m";
cat ${NAME}*.gff ${NAME}*.fna > gff3/${NAME}.gff3;
done
