# Supplementary material for: Comparative genomics of 40 Weissella paramesenteroides strains
Source: Front Microbiol. 2023 Mar 31;14:1128028. doi: 10.3389/fmicb.2023.1128028 (PMC10102382; doi:10.3389/fmicb.2023.1128028)
Supplement: Supplementary file 3 [file Table_1.xlsx]

## Sheet: Sheet1
Supplementary Table 1. plasmidSPAdes analyses of the 6 newly sequenced W. paramesenteroides strains.
Strain	Nbr of genome contigs	Nbr of (putative) plasmids
B1	12	1
C8	19	3
SJ21-9	35	27
SJ27-4	36	12
SJ27-5	35	19
W31	2	1
