# Supplementary material for: Comparative genomics of 40 Weissella paramesenteroides strains
Source: Front Microbiol. 2023 Mar 31;14:1128028. doi: 10.3389/fmicb.2023.1128028 (PMC10102382; doi:10.3389/fmicb.2023.1128028)
Supplement: Supplementary file 4 [file Table_2.xlsx]

## Sheet: Sheet1
Supplementary Table 2. Metabolic pathways of W. paramesenteroides core genome reconstructed in KEGG-mapper.
Metabolism
Global and overview maps
01100 Metabolic pathways (227)
01110 Biosynthesis of secondary metabolites (96)
01120 Microbial metabolism in diverse environments (52)
01200 Carbon metabolism (27)
01210 2-Oxocarboxylic acid metabolism (4)
01212 Fatty acid metabolism (9)
01230 Biosynthesis of amino acids (39)
01232 Nucleotide metabolism (28)
01250 Biosynthesis of nucleotide sugars (17)
01240 Biosynthesis of cofactors (44)
01220 Degradation of aromatic compounds (3)
Carbohydrate metabolism
00010 Glycolysis / Gluconeogenesis (12)
00020 Citrate cycle (TCA cycle) (1)
00030 Pentose phosphate pathway (11)
00040 Pentose and glucuronate interconversions (5)
00051 Fructose and mannose metabolism (4)
00052 Galactose metabolism (11)
00053 Ascorbate and aldarate metabolism (1)
00500 Starch and sucrose metabolism (5)
00520 Amino sugar and nucleotide sugar metabolism (20)
00620 Pyruvate metabolism (12)
00630 Glyoxylate and dicarboxylate metabolism (5)
00640 Propanoate metabolism (6)
00650 Butanoate metabolism (7)
00660 C5-Branched dibasic acid metabolism (2)
00562 Inositol phosphate metabolism (1)
Energy metabolism
00190 Oxidative phosphorylation (12)
00195 Photosynthesis (8)
00710 Carbon fixation in photosynthetic organisms (6)
00720 Carbon fixation pathways in prokaryotes (8)
00680 Methane metabolism (6)
00910 Nitrogen metabolism (2)
00920 Sulfur metabolism (2)
Lipid metabolism
00061 Fatty acid biosynthesis (10)
00071 Fatty acid degradation (1)
00120 Primary bile acid biosynthesis (1)
00121 Secondary bile acid biosynthesis (1)
00561 Glycerolipid metabolism (6)
00564 Glycerophospholipid metabolism (7)
Nucleotide metabolism
00230 Purine metabolism (31)
00240 Pyrimidine metabolism (21)
Amino acid metabolism
00250 Alanine, aspartate and glutamate metabolism (13)
00260 Glycine, serine and threonine metabolism (7)
00270 Cysteine and methionine metabolism (12)
00280 Valine, leucine and isoleucine degradation (3)
00290 Valine, leucine and isoleucine biosynthesis (2)
00300 Lysine biosynthesis (10)
00310 Lysine degradation (1)
00220 Arginine biosynthesis (3)
00330 Arginine and proline metabolism (5)
00350 Tyrosine metabolism (3)
00360 Phenylalanine metabolism (2)
00380 Tryptophan metabolism (1)
00400 Phenylalanine, tyrosine and tryptophan biosynthesis (6)
Metabolism of other amino acids
00430 Taurine and hypotaurine metabolism (1)
00450 Selenocompound metabolism (4)
00460 Cyanoamino acid metabolism (2)
00470 D-Amino acid metabolism (6)
00480 Glutathione metabolism (6)
Glycan biosynthesis and metabolism
00540 Lipopolysaccharide biosynthesis (2)
00541 O-Antigen nucleotide sugar biosynthesis (5)
00550 Peptidoglycan biosynthesis (15)
00552 Teichoic acid biosynthesis (5)
Metabolism of cofactors and vitamins
00730 Thiamine metabolism (7)
00740 Riboflavin metabolism (4)
00750 Vitamin B6 metabolism (1)
00760 Nicotinate and nicotinamide metabolism (6)
00770 Pantothenate and CoA biosynthesis (5)
00780 Biotin metabolism (4)
00790 Folate biosynthesis (2)
00670 One carbon pool by folate (9)
00130 Ubiquinone and other terpenoid-quinone biosynthesis (6)
Metabolism of terpenoids and polyketides
00900 Terpenoid backbone biosynthesis (6)
00908 Zeatin biosynthesis (1)
01054 Nonribosomal peptide structures (1)
Biosynthesis of other secondary metabolites
00966 Glucosinolate biosynthesis (1)
00332 Carbapenem biosynthesis (2)
00261 Monobactam biosynthesis (4)
00521 Streptomycin biosynthesis (2)
00524 Neomycin, kanamycin and gentamicin biosynthesis (1)
00333 Prodigiosin biosynthesis (1)
00998 Biosynthesis of various antibiotics; Including: Kanosamine biosynthesis, Aurachin biosynthesis, Bacilysin biosynthesis, Puromycin biosynthesis, Dapdiamides biosynthesis, Fosfomycin biosynthesis, Cremeomycin biosynthesis, Pentalenolactone biosynthesis, Terpentecin biosynthesis, Roseoflavin biosynthesis, Cycloserine biosynthesis (1)
00999 Biosynthesis of various plant secondary metabolites; Including: Crocin biosynthesis, Cannabidiol biosynthesis, Mugineic acid biosynthesis, Pentagalloylglucose biosynthesis, Benzoxazinoid biosynthesis, Gramine biosynthesis, Coumarin biosynthesis, Furanocoumarin biosynthesis, Hordatine biosynthesis, Podophyllotoxin biosynthesis (2)
Xenobiotics biodegradation and metabolism
00362 Benzoate degradation (3)
00627 Aminobenzoate degradation (3)
00625 Chloroalkane and chloroalkene degradation (1)
00361 Chlorocyclohexane and chlorobenzene degradation (1)
00622 Xylene degradation (2)
00643 Styrene degradation (2)
00621 Dioxin degradation (1)
00626 Naphthalene degradation (1)
00983 Drug metabolism - other enzymes (5)
Genetic Information Processing
Transcription
03020 RNA polymerase (5)
Translation
03010 Ribosome (52)
00970 Aminoacyl-tRNA biosynthesis (25)
03008 Ribosome biogenesis in eukaryotes (1)
Folding, sorting and degradation
03060 Protein export (9)
04141 Protein processing in endoplasmic reticulum (1)
03018 RNA degradation (9)
Replication and repair
03030 DNA replication (11)
03410 Base excision repair (6)
03420 Nucleotide excision repair (6)
03430 Mismatch repair (16)
03440 Homologous recombination (18)
Information processing in viruses
03250 Viral life cycle - HIV-1 (1)
Environmental Information Processing
Membrane transport
02010 ABC transporters (32)
02060 Phosphotransferase system (PTS) (6)
03070 Bacterial secretion system (8)
Signal transduction
02020 Two-component system (12)
04016 MAPK signaling pathway - plant (1)
04066 HIF-1 signaling pathway (4)
04070 Phosphatidylinositol signaling system (1)
Cellular Processes
Cell growth and death
04112 Cell cycle - Caulobacter (9)
04217 Necroptosis (2)
Cellular community - prokaryotes
02024 Quorum sensing (14)
05111 Biofilm formation - Vibrio cholerae (1)
02026 Biofilm formation - Escherichia coli (1)
Organismal Systems
Immune system
04621 NOD-like receptor signaling pathway (1)
Endocrine system
04922 Glucagon signaling pathway (3)
03320 PPAR signaling pathway (2)
04917 Prolactin signaling pathway (1)
04918 Thyroid hormone synthesis (2)
Digestive system
04978 Mineral absorption (1)
Nervous system
04724 Glutamatergic synapse (1)
04727 GABAergic synapse (1)
Aging
04212 Longevity regulating pathway - worm (3)
Environmental adaptation
04626 Plant-pathogen interaction (1)
Human Diseases
Cancer: overview
05205 Proteoglycans in cancer (1)
05203 Viral carcinogenesis (1)
05230 Central carbon metabolism in cancer (4)
Infectious disease: viral
05165 Human papillomavirus infection (1)
Infectious disease: bacterial
05130 Pathogenic Escherichia coli infection (1)
05132 Salmonella infection (2)
05134 Legionellosis (2)
05150 Staphylococcus aureus infection (1)
05152 Tuberculosis (3)
Infectious disease: parasitic
05146 Amoebiasis (1)
Immune disease
05340 Primary immunodeficiency (1)
Neurodegenerative disease
05010 Alzheimer disease (1)
05012 Parkinson disease (1)
05014 Amyotrophic lateral sclerosis (1)
05016 Huntington disease (1)
05022 Pathways of neurodegeneration - multiple diseases (1)
Cardiovascular disease
05417 Lipid and atherosclerosis (1)
05418 Fluid shear stress and atherosclerosis (2)
05415 Diabetic cardiomyopathy (4)
Endocrine and metabolic disease
04930 Type II diabetes mellitus (1)
04940 Type I diabetes mellitus (1)
04931 Insulin resistance (1)
Drug resistance: antimicrobial
01501 beta-Lactam resistance (5)
01502 Vancomycin resistance (6)
01503 Cationic antimicrobial peptide (CAMP) resistance (3)
Drug resistance: antineoplastic
01524 Platinum drug resistance (1)
01523 Antifolate resistance (4)
