# Supplementary material for: Comparative genomics of 40 Weissella paramesenteroides strains
Source: Front Microbiol. 2023 Mar 31;14:1128028. doi: 10.3389/fmicb.2023.1128028 (PMC10102382; doi:10.3389/fmicb.2023.1128028)
Supplement: Supplementary file 5 [file Table_3.xlsx]

## Sheet: ANIm_percentage_identity
Supplementary Table 3. Average Nucleotide Identity among all 10 available W. hellenica and W. paramesenteroides strains DmW_118, DmW_118119
	Wikim14	1.2.50	CBA3632	MBEL1842	DmW_118	PC1A	0916-4-2	DmW_118119	NBRC_15553	R-53116	CCUG_33494	NBRC_15553_2
Wikim14	1	0.991919	0.997532	0.996078	0.993967	0.993496	0.996135	0.993964	0.90672	0.906621	0.906884	0.906624
1.2.50	0.991919	1	0.992368	0.992316	0.993956	0.990828	0.991779	0.994009	0.907607	0.907456	0.907692	0.907516
CBA3632	0.997532	0.992368	1	0.995449	0.993614	0.99295	0.995934	0.993628	0.906895	0.906887	0.906939	0.90685
MBEL1842	0.996078	0.992316	0.995449	1	0.993219	0.992529	0.995674	0.993221	0.907044	0.907013	0.907117	0.906918
DmW_118	0.993967	0.993956	0.993614	0.993219	1	0.993862	0.9935	0.999998	0.90567	0.905374	0.90573	0.905511
PC1A	0.993496	0.990828	0.99295	0.992529	0.993862	1	0.993525	0.99416	0.907	0.907104	0.907022	0.906847
0916-4-2	0.996135	0.991779	0.995934	0.995674	0.9935	0.993525	1	0.993546	0.907546	0.90749	0.907722	0.907437
DmW_118119	0.993964	0.994009	0.993628	0.993221	0.999998	0.99416	0.993546	1	0.905618	0.905386	0.905654	0.905462
NBRC_15553	0.90672	0.907607	0.906895	0.907044	0.90567	0.907	0.907546	0.905618	1	0.999936	0.999943	0.999964
R-53116	0.906621	0.907456	0.906887	0.907013	0.905374	0.907104	0.90749	0.905386	0.999936	1	0.999965	0.999981
CCUG_33494	0.906884	0.907692	0.906939	0.907117	0.90573	0.907022	0.907722	0.905654	0.999943	0.999965	1	0.999985
NBRC_15553_2	0.906624	0.907516	0.90685	0.906918	0.905511	0.906847	0.907437	0.905462	0.999964	0.999981	0.999985	1
