# Supplementary material for: Comparative genomics of 40 Weissella paramesenteroides strains
Source: Front Microbiol. 2023 Mar 31;14:1128028. doi: 10.3389/fmicb.2023.1128028 (PMC10102382; doi:10.3389/fmicb.2023.1128028)
Supplement: Supplementary file 6 [file Table_4.xlsx]

## Sheet: Sheet1
Supplementary Table 4. Prophage prediction of the 42 genomes
Strains	Region	Region length	Completeness	Score	#CDS	Region position	GC %	Specific keywords
SJ21-9	1	44.4Kb	intact	150	60	175429-219921	37.85%	capsid,tail,head,protease,portal,terminase,integrase
	2	40.8Kb	questionable	70	51	1105618-1146507	37.71%	recombinase,portal,integrase
	3	37.7Kb	intact	150	57	1281200-1318911	37.83%	integrase,recombinase,terminase,portal,head,capsid,tail
	4	47.6Kb	incomplete	40	33	2000055-2047749	36.83%	integrase
SJ27-4	1	23.6Kb	incomplete	60	37	456053-479737	39.31%	tail,recombinase,capsid
	2	48Kb	intact	150	61	679413-727478	37.43%	integrase,terminase,capsid,head,lysin,recombinase,tail,plate
	3	19.1Kb	incomplete	40	39	1265892-1285033	36.58%	integrase,protease,terminase
	4	20.2Kb	incomplete	40	24	1955395-1975655	37.33%	integrase,portal,recombinase
	5	14Kb	incomplete	20	16	2028078-2042128	37.10%	integrase
SJ17-5	1	23.6Kb	incomplete	60	37	255968-279652	39.31%	recombinase,capsid,tail
	2	43.8Kb	intact	150	61	804907-848794	37.80%	tail,plate,recombinase,lysin,head,capsid,terminase,integrase
	3	19.1Kb	incomplete	40	39	1265892-1285033	36.58%	integrase,protease,terminase
	4	18.6Kb	incomplete	50	25	1922169-1940781	37.10%	head,recombinase,portal,integrase
B1	1	44.3Kb	intact	150	62	433342-477730	37.42%	plate,tail,recombinase,lysin,head,capsid,terminase,integrase
	2	39.7Kb	incomplete	60	49	1591622-1631344	37.96%	recombinase,integrase
C8	1	41.3Kb	intact	150	60	29325-70697	37.18%	integrase,tail,recombinase,protease,terminase,portal,head
	2	41.5Kb	intact	150	53	1190227-1231811	38.31%	plate,lysin,tail,head,protease,portal,terminase,recombinase,integrase
W31	1	44.3Kb	intact	150	62	935687-980075	37.42%	plate,tail,recombinase,lysin,head,capsid,terminase,integrase
	2	39.7Kb	incomplete	60	49	1256236-1295958	37.96%	recombinase,integrase
3.2.24	1	39.8Kb	intact	130	43	1107445-1147308	39.71%	lysin,tail,capsid,protease,portal,terminase,integrase
	2	53.7Kb	intact	150	62	1152242-1206030	37.95%	plate,lysin,tail,head,protease,portal,terminase,integrase
A37	1	51.4Kb	intact	150	55	420854-472264	37.56%	tail,plate,recombinase,head,capsid,terminase,integrase
	2	45.3Kb	intact	150	65	1527544-1572927	38.24%	integrase,protease,terminase,portal,head,tail,lysin,plate,lysis
ATCC 33313	1	49.4Kb	intact	130	64	98400-147896	39.23%	recombinase,capsid,tail,head,portal,terminase
	2	36.4Kb	incomplete	60	52	618345-654761	37.50%	recombinase,integrase
FDAARGOS 414	1	39.7Kb	incomplete	60	52	401307-441010	37.74%	integrase,recombinase
	2	33.6Kb	questionable	80	22	719582-753183	38.19%	transposase,tail
MGYG-HGUT-01340	1	49.4Kb	intact	130	64	98400-147896	39.23%	recombinase,capsid,tail,head,portal,terminase
	2	36.4Kb	incomplete	60	52	618345-654761	37.50%	recombinase,integrase
N43	1	51.4Kb	intact	150	55	420854-472264	37.56%	tail,plate,recombinase,head,capsid,terminase,integrase
	2	57.5Kb	intact	150	65	1455893-1513404	38.04%	lysis,plate,lysin,tail,head,protease,portal,terminase,integrase
STCH-BD1	1	42.8Kb	intact	130	61	1562500-1605388	37.44%	integrase,terminase,portal,protease,head,tail
	2	49.2Kb	intact	130	60	1887171-1936427	37.50%	integrase,terminase,capsid,head,tail,plate
TR212	1	24.7Kb	questionable	80	9	27428-52166	41.11%	transposase,integrase,tail
	2	44.1Kb	intact	150	60	1335093-1379261	37.81%	tail,plate,head,capsid,terminase,integrase
	3	43.7Kb	intact	150	63	1487925-1531645	38.35%	integrase,terminase,portal,protease,head,tail,lysin,plate
	4	31.6Kb	questionable	90	25	1888317-1919967	37.85%	integrase,capsid,recombinase,transposase,portal
WpK4	1	41.8Kb	incomplete	60	26	21660-63545	39.22%	integrase,tail
	2	41.5Kb	intact	150	57	524284-565820	38.62%	integrase,terminase,portal,protease,head,tail,lysin,plate
DRD-39	1	23Kb	incomplete	30	39	107840-130852	36.77%	integrase,recombinase
	2	11.7Kb	incomplete	60	17	563886-575665	37.96%	transposase,plate,tail,capsid
	3	25Kb	intact	130	33	1321142-1346145	39.59%	terminase,portal,head,capsid,lysin,tail,plate
	4	12.1Kb	incomplete	30	23	1752300-1764418	35.56%	capsid,integrase
DRD-105	1	39.1Kb	questionable	70	56	477906-517048	35.91%	integrase,capsid,recombinase
	2	25Kb	intact	130	33	724026-749029	39.59%	terminase,portal,head,capsid,lysin,tail,plate
	3	33.7Kb	intact	150	38	1918192-1951950	38.42%	capsid,tail,lysin,transposase,recombinase,plate
DRD-137	1	25Kb	intact	130	33	574286-599289	39.59%	tail,plate,lysin,head,capsid,portal,terminase
	2	57.9Kb	intact	110	77	809668-867615	36.05%	lysis,recombinase,terminase,capsid,integrase
	3	8.8Kb	incomplete	40	12	1341057-1349932	38.80%	transposase
	4	24Kb	intact	130	27	1926986-1951071	38.56%	capsid,recombinase,transposase,tail,lysin
DRD-142	1	7.8Kb	incomplete	20	9	917367-925261	41.60%	tail
	2	9.2Kb	incomplete	10	9	960282-969531	36.15%	NA
	3	13.4Kb	incomplete	20	20	1362241-1375709	33.89%	integrase
	4	7.5Kb	incomplete	10	11	1463357-1470889	36.19%	NA
	5	7.9Kb	incomplete	30	8	1595621-1603537	40.37%	tail,protease
DRD-149	1	34.3Kb	incomplete	60	40	42438-76758	36.44%	recombinase,integrase
	2	25Kb	intact	130	33	1293907-1318910	39.59%	terminase,portal,head,capsid,lysin,tail,plate
	3	12.1Kb	incomplete	30	25	1741939-1754057	35.56%	capsid,integrase
	4	21Kb	intact	120	23	1931491-1952543	38.39%	capsid,lysin,tail,transposase,head,plate
DRD-169	1	54.4Kb	intact	110	74	685034-739500	35.96%	integrase,capsid,recombinase,terminase,lysis
	2	25Kb	intact	130	33	982857-1007860	39.59%	terminase,portal,head,capsid,lysin,tail,plate
	3	11.7Kb	incomplete	40	16	1505072-1516805	39.25%	tail,capsid
	4	17Kb	questionable	90	20	1888818-1905897	38.26%	tail,plate,transposase,lysin,capsid,recombinase
DRD-172	1	21.2Kb	incomplete	50	33	710553-731772	35.95%	integrase,capsid,terminase
	2	25Kb	intact	130	33	1092984-1117987	39.59%	tail,plate,lysin,head,capsid,portal,terminase
	3	24.4Kb	incomplete	30	30	1378136-1402564	36.09%	recombinase,integrase
	4	23.3Kb	intact	120	28	1873522-1896855	38.49%	transposase,plate,recombinase,tail,lysin,capsid
DRD-187	1	20.7Kb	incomplete	40	29	177300-198057	35.54%	integrase,capsid,terminase
	2	25Kb	intact	130	33	612530-637533	39.59%	tail,plate,lysin,head,capsid,portal,terminase
	3	27.3Kb	incomplete	40	38	837888-865193	36.38%	recombinase,integrase
	4	18.8Kb	intact	110	22	1918764-1937658	38.31%	transposase,plate,recombinase,capsid,tail,lysin
	5	12.8Kb	incomplete	50	14	1938559-1951372	39.81%	transposase,capsid
DRD-194	1	25Kb	intact	130	33	1169209-1194212	39.59%	tail,plate,lysin,head,capsid,portal,terminase
	2	55.9Kb	intact	110	75	1387228-1443189	36.10%	lysis,terminase,recombinase,capsid,integrase
	3	26.7Kb	intact	130	30	1917654-1944435	38.48%	transposase,capsid,recombinase,plate,tail,lysin
	4	8.4Kb	incomplete	50	10	1944612-1953013	38.59%	transposase,capsid
DmW_107	1	47.9Kb	intact	150	63	509341-557292	38.14%	integrase,portal,terminase,head,capsid,tail,plate
	2	19.7Kb	questionable	80	24	1089246-1108994	39.84%	tail,capsid,head,portal,terminase
	3	21.9Kb	incomplete	20	26	1103832-1125824	36.83%	integrase
	4	25Kb	incomplete	40	37	1208154-1233209	37.72%	integrase
	5	19.7Kb	questionable	80	24	1236898-1256646	39.84%	terminase,portal,head,capsid,tail
	6	24.4Kb	intact	100	31	1631460-1655873	38.39%	tail,head,protease,portal,terminase
	7	16.3Kb	incomplete	20	28	1656407-1672764	35.51%	integrase
DmW_109	1	38.3Kb	intact	150	59	627-38962	37.39%	tail,capsid,protease,portal,terminase,recombinase,integrase
	2	44.1Kb	intact	130	61	586030-630206	37.92%	tail,plate,head,capsid,portal,terminase,integrase
	3	28Kb	intact	140	27	1089943-1118005	37.03%	lysis,tail,head,capsid,protease,portal,terminase
	4	24.6Kb	incomplete	30	26	1120957-1145616	36.80%	recombinase,integrase
DmW_115	1	21.7Kb	questionable	80	23	785987-807746	39.49%	terminase,portal,head,tail
	2	47.3Kb	intact	150	61	1227523-1274915	37.62%	integrase,terminase,head,capsid,tail,plate
	3	41.6Kb	intact	150	58	1600600-1642271	37.94%	integrase,recombinase,terminase,portal,protease,head,tail,lysin,plate,lysis
DmW_118	1	15.8Kb	incomplete	30	10	108050-123856	35.40%	integrase,tail
	2	31.7Kb	incomplete	40	9	560344-592060	35.04%	integrase,head
	3	18.2Kb	incomplete	60	28	832124-850359	33.97%	capsid,portal,terminase
DmW_107099	1	19.7Kb	questionable	80	24	67338-87086	39.84%	tail,capsid,head,portal,terminase
	2	21.9Kb	incomplete	20	25	81924-103916	36.83%	integrase
	3	50.7Kb	intact	140	62	779118-829906	38.19%	tail,plate,head,capsid,terminase,portal
	4	51.7Kb	intact	150	63	1030725-1082480	37.13%	tail,head,protease,portal,terminase,integrase,transposase
DmW_107100	1	44.8Kb	intact	140	58	63261-108147	38.18%	portal,terminase,head,capsid,tail,plate
	2	24.4Kb	intact	100	31	1001175-1025588	38.39%	tail,head,protease,portal,terminase
	3	10.7Kb	incomplete	10	23	1028113-1038882	37.56%	NA
	4	13.1Kb	incomplete	20	26	1719536-1732663	38.07%	integrase
	5	19.7Kb	questionable	80	24	1736357-1756105	39.84%	terminase,portal,head,capsid,tail
DmW_107101	1	44.8Kb	intact	140	58	63261-108147	38.18%	portal,terminase,head,capsid,tail,plate
	2	24.4Kb	intact	100	31	1001175-1025588	38.39%	tail,head,protease,portal,terminase
	3	10.7Kb	incomplete	10	23	1028113-1038882	37.56%	NA
	4	13.1Kb	incomplete	20	26	1719536-1732663	38.07%	integrase
	5	19.7Kb	questionable	80	24	1736357-1756105	39.84%	terminase,portal,head,capsid,tail
DmW_107102	1	53.2Kb	intact	140	66	27346-80613	36.92%	terminase,integrase,portal,protease,head,tail
	2	43.2Kb	intact	140	55	444935-488147	38.38%	tail,plate,head,capsid,terminase,portal
	3	19.7Kb	questionable	80	24	1589967-1609715	39.84%	tail,capsid,head,portal,terminase
	4	21.9Kb	incomplete	20	25	1604553-1626545	36.83%	integrase
DmW_107104	1	25.1Kb	incomplete	40	21	98514-123621	34.92%	terminase,integrase
	2	44.6Kb	intact	120	62	710151-754789	37.48%	tail,head,protease,portal,terminase
	3	19.7Kb	questionable	80	24	1109326-1129074	39.84%	tail,capsid,head,portal,terminase
	4	21.9Kb	incomplete	20	26	1123912-1145904	36.83%	integrase
	5	17.6Kb	incomplete	20	8	1296172-1313842	40.11%	integrase
	6	43.6Kb	intact	140	56	1802828-1846443	38.36%	tail,plate,head,capsid,terminase,portal
DmW_107105	1	19.7Kb	questionable	80	24	178944-198692	39.84%	tail,capsid,head,portal,terminase
	2	21.9Kb	incomplete	20	26	193530-215522	36.83%	integrase
	3	43.6Kb	intact	140	57	492704-536319	38.36%	portal,terminase,head,capsid,tail,plate
	4	44.6Kb	intact	130	67	705148-749840	37.80%	integrase,terminase,portal,protease,head,tail
DmW_107106	1	19.7Kb	questionable	80	24	179043-198791	39.84%	tail,capsid,head,portal,terminase
	2	21.9Kb	incomplete	20	26	193629-215621	36.83%	integrase
	3	50.7Kb	intact	140	63	396448-447236	38.19%	portal,terminase,head,capsid,tail,plate
	4	53.6Kb	intact	130	62	1476206-1529897	37.20%	integrase,terminase,portal,protease,head,tail
DmW_107108	1	13.1Kb	incomplete	20	25	279720-292847	38.07%	integrase
	2	19.7Kb	questionable	80	24	296541-316289	39.84%	terminase,portal,head,capsid,tail
	3	43.6Kb	intact	140	56	623464-667079	38.36%	portal,terminase,head,capsid,tail,plate
	4	37.7Kb	intact	120	58	1091358-1129065	37.47%	tail,head,protease,portal,terminase
DmW_109110	1	48.3Kb	intact	130	60	484598-532951	37.55%	integrase,terminase,portal,head,capsid,tail,plate
	2	38.3Kb	intact	150	59	928021-966356	37.39%	tail,capsid,protease,portal,terminase,recombinase,integrase
	3	31.6Kb	incomplete	40	26	1695005-1726638	36.34%	integrase,recombinase
	4	28Kb	intact	140	27	1723637-1751645	37.03%	terminase,portal,protease,capsid,tail,head,lysis
DmW_115112	1	50.3Kb	intact	150	61	259516-309863	37.66%	tail,plate,head,capsid,terminase,integrase
	2	54.2Kb	intact	150	58	361823-416052	37.78%	lysis,plate,lysin,tail,head,protease,portal,terminase,recombinase,integrase
	3	21.7Kb	questionable	80	23	1739986-1761745	39.49%	tail,head,portal,terminase
DmW_115113	1	21.7Kb	questionable	80	23	593079-614838	39.49%	tail,head,portal,terminase
	2	41.6Kb	intact	150	58	770088-811759	37.94%	integrase,recombinase,terminase,portal,protease,head,tail,lysin,plate,lysis
	3	50.3Kb	intact	140	61	1448832-1499179	37.66%	tail,plate,head,capsid,portal,terminase,integrase
DmW_115114	1	41.6Kb	intact	150	58	185337-227008	37.94%	integrase,recombinase,terminase,portal,protease,head,tail,lysin,plate,lysis
	2	21.7Kb	questionable	80	23	710133-731892	39.49%	tail,head,portal,terminase
	3	47.3Kb	intact	140	62	1397541-1444933	37.62%	integrase,terminase,portal,head,capsid,tail,plate
DmW_115116	1	21.7Kb	questionable	80	23	255471-277230	39.49%	terminase,portal,head,tail
	2	41.6Kb	intact	150	58	888298-929969	37.94%	integrase,recombinase,terminase,portal,protease,head,tail,lysin,plate,lysis
	3	47.3Kb	intact	150	62	1157316-1204708	37.62%	integrase,terminase,head,capsid,tail,plate
DmW_118119	1	31.7Kb	incomplete	40	10	507076-538792	35.04%	integrase,head
	2	18.2Kb	questionable	70	29	1675705-1693940	33.97%	capsid,terminase,portal
