# Supplementary material for: Comparative genomics of 40 Weissella paramesenteroides strains
Source: Front Microbiol. 2023 Mar 31;14:1128028. doi: 10.3389/fmicb.2023.1128028 (PMC10102382; doi:10.3389/fmicb.2023.1128028)
Supplement: Supplementary file 7 [file Table_5.xlsx]

## Sheet: Sheet1
Supplementary Table 5. CRISPRCasFinder results showing the statistics of CAS and CRISPR of W. paramesenteroides starins
Strain	Evidence Level	Nbr CAS Type	Nbr CAS	CAS Per Type	CompleteSystem
A37	0	1	1	1	0
ATCC_33313	0	1	1	1	0
B1	0	1	1	1	0
DmW_107	0	1	2	2	0
DRD-105	0	1	5	5	0
DRD-137	0	1	2	2	0
DRD-142	0	1	5	5	0
DRD-149	0	1	3	3	0
DRD-169	0	1	4	4	0
DRD-172	0	1	5	5	0
DRD-187	0	1	5	5	0
DRD-194	0	1	5	5	0
DRD-39	0	1	4	4	0
FDAARGOS_414	0	1	5	5	0
MGYG-HGUT-01340	0	1	1	1	0
N43	0	1	1	1	0
STCH-BD1	0	1	5	5	0
TR212	0	1	1	1	0
W31	0	1	5	5	0
WpK4	0	1	5	5	0
Strain	Node	Spacers	Evidence Level	DR Length	DR Consensus	Direction	Potential Orientation	Cas	CRISPR Start	CRISPR End	Length
3.2.24	NZ_JAGXJB010000002.1	1	1	23	CRT results	ND	ND	Cas3_0_I	98690	98769	80
3.2.24	NZ_JAGXJB010000001.1	2	1	23	CRT results	ND	ND	Cas3_0_I	44965	45089	125
3.2.24	NZ_JAGXJB010000001.1	6	1	29	CRT results	ND	ND	Cas3_0_I	489857	490245	389
A37	NZ_SDQQ01000002.1	5	1	34	CRT results	ND	ND	Cas3_0_I	110142	110475	334
A37	NZ_SDQQ01000003.1	1	1	25	CCGAATTAGCTCAGTTGGTAGAGCA	ND	ND	Cas3_0_I	302	404	103
ATCC_33313	NZ_GG697132.1	1	1	25	TGCTCTACCAACTGAGCTAAGTCGG	ND	ND	Cas3_0_I	278549	278651	103
ATCC_33313	NZ_GG697129.1	1	1	35	CRT results	ND	ND	Cas3_0_I	127251	127345	95
ATCC_33313	NZ_GG697129.1	3	1	35	CRT results	ND	ND	Cas3_0_I	127354	127568	215
B1	NODE_2_length_604634_cov_88.515695	7	1	35	CRT results	ND	ND	Cas3_0_I	110175	110629	455
B1	NODE_2_length_604634_cov_88.515695	3	1	26	CRT results	ND	ND	Cas3_0_I	557195	557373	179
B1	NODE_3_length_270272_cov_91.069777	1	1	25	TGCTCTACCAACTGAGCTAAGTCGG	ND	ND	Cas3_0_I	270039	270141	103
C8	NODE_4_length_203546_cov_79.639527	1	1	23	CRT results	ND	ND	Cas3_0_I	108539	108618	80
C8	NODE_2_length_535952_cov_77.343954	8	1	35	CRT results	ND	ND	Cas3_0_I	110141	110655	515
DmW_107	NZ_VHPP01000003.1	5	1	35	CRT results	ND	ND	Cas3_0_I,Cas3_0_I	58228	58562	335
DmW_107	NZ_VHPP01000003.1	2	1	23	CRT results	ND	ND	Cas3_0_I,Cas3_0_I	556928	557052	125
DmW_107	NZ_VHPP01000001.1	1	1	25	TGCTCTACCAACTGAGCTAAGTCGG	ND	ND	Cas3_0_I,Cas3_0_I	1014952	1015054	103
DmW_107099	NZ_VHPS01000001.1	5	1	35	CRT results	ND	ND	Cas3_0_I	56495	56829	335
DmW_107099	NZ_VHPS01000002.1	1	1	23	CRT results	ND	ND	Cas3_0_I	137682	137761	80
DmW_107100	NZ_VHPR01000001.1	5	1	35	CRT results	ND	ND	Cas3_0_I	242153	242487	335
DmW_107100	NZ_VHPR01000004.1	1	1	23	CRT results	ND	ND	Cas3_0_I	137674	137753	80
DmW_107101	NZ_VHPN01000005.1	5	1	35	CRT results	ND	ND	Cas3_0_I	56495	56829	335
DmW_107101	NZ_VHPN01000013.1	1	1	23	CRT results	ND	ND	Cas3_0_I	137682	137761	80
DmW_107102	NZ_VHPO01000012.1	1	1	35	CRT results	ND	ND	Cas3_0_I	73	167	95
DmW_107102	NZ_VHPO01000001.1	1	1	23	CRT results	ND	ND	Cas3_0_I	94785	94864	80
DmW_107104	NZ_VHPM01000004.1	1	1	23	CRT results	ND	ND	Cas3_0_I	137682	137761	80
DmW_107104	NZ_VHPM01000039.1	2	1	35	CRT results	ND	ND	Cas3_0_I	56495	56649	155
DmW_107105	NZ_VHPL01000045.1	1	1	35	CRT results	ND	ND	Cas3_0_I	17	111	95
DmW_107105	NZ_VHPL01000006.1	1	1	23	CRT results	ND	ND	Cas3_0_I	137674	137753	80
DmW_107106	NZ_VHPQ01000002.1	5	1	35	CRT results	ND	ND	Cas3_0_I	56495	56829	335
DmW_107106	NZ_VHPQ01000007.1	1	1	23	CRT results	ND	ND	Cas3_0_I	94785	94864	80
DmW_107108	NZ_VHPK01000009.1	1	1	23	CRT results	ND	ND	Cas3_0_I	94777	94856	80
DmW_107108	NZ_VHPK01000006.1	5	1	35	CRT results	ND	ND	Cas3_0_I	140553	140887	335
DmW_109	NZ_VHPI01000006.1	1	1	23	CRT results	ND	ND	Cas3_0_I	93449	93528	80
DmW_109	NZ_VHPI01000007.1	3	1	35	CRT results	ND	ND	Cas3_0_I	109853	110067	215
DmW_109110	NZ_VHPJ01000005.1	3	1	35	CRT results	ND	ND	Cas3_0_I	109861	110075	215
DmW_109110	NZ_VHPJ01000006.1	1	1	23	CRT results	ND	ND	Cas3_0_I	93451	93530	80
DmW_115	NZ_VHPG01000011.1	4	1	35	CRT results	ND	ND	Cas3_0_I	20	294	275
DmW_115	NZ_VHPG01000008.1	1	1	23	CRT results	ND	ND	Cas3_0_I	150054	150133	80
DmW_115112	NZ_VHPF01000003.1	7	1	34	CRT results	ND	ND	Cas3_0_I	249897	250350	454
DmW_115112	NZ_VHPF01000001.1	1	1	23	CRT results	ND	ND	Cas3_0_I	94114	94193	80
DmW_115113	NZ_VHPE01000004.1	7	1	35	CRT results	ND	ND	Cas3_0_I	48873	49327	455
DmW_115113	NZ_VHPE01000008.1	1	1	23	CRT results	ND	ND	Cas3_0_I	150056	150135	80
DmW_115114	NZ_VHPD01000005.1	5	1	35	CRT results	ND	ND	Cas3_0_I	48805	49139	335
DmW_115114	NZ_VHPD01000009.1	1	1	23	CRT results	ND	ND	Cas3_0_I	150048	150127	80
DmW_115116	NZ_VHPH01000008.1	1	1	23	CRT results	ND	ND	Cas3_0_I	94108	94187	80
DmW_115116	NZ_VHPH01000007.1	7	1	35	CRT results	ND	ND	Cas3_0_I	249897	250351	455
DRD-105	NZ_JAMRXE010000001.1	1	1	25	TGCTCTACCAACTGAGCTAAGTCGG	ND	ND	Cas3_0_I,Cas3_0_I,Cas3_0_I,Cas3_0_I,Cas3_0_I	1604938	1605040	103
DRD-137	NZ_JAMRXD010000001.1	6	1	35	CRT results	ND	ND	Cas3_0_I,Cas3_0_I,Cas3_0_I	1082261	1082655	395
DRD-137	NZ_JAMRXD010000002.1	1	1	25	TGCTCTACCAACTGAGCTAAGTCGG	ND	ND	Cas3_0_I,Cas3_0_I	263589	263691	103
DRD-142	NZ_JAMRXC010000001.1	1	1	25	CCGAATTAGCTCAGTTGGTAGAGCA	ND	ND	Cas3_0_I,Cas3_0_I,Cas3_0_I,Cas3_0_I,Cas3_0_I	404233	404335	103
DRD-149	NZ_JAMRXB010000001.1	1	1	25	CCGAATTAGCTCAGTTGGTAGAGCA	ND	ND	Cas3_0_I,Cas3_0_I,Cas3_0_I	863711	863813	103
DRD-169	NZ_JAMRXA010000001.1	1	1	25	CCGAATTAGCTCAGTTGGTAGAGCA	ND	ND	Cas3_0_I,Cas3_0_I,Cas3_0_I,Cas3_0_I	312972	313074	103
DRD-169	NZ_JAMRXA010000002.1	4	1	39	CRT results	ND	ND	Cas3_0_I	259667	260158	492
DRD-172	NZ_JAMRWZ010000001.1	1	1	25	CCGAATTAGCTCAGTTGGTAGAGCA	ND	ND	Cas3_0_I,Cas3_0_I,Cas3_0_I,Cas3_0_I,Cas3_0_I	312961	313063	103
DRD-187	NZ_JAMRWY010000001.1	1	1	25	CCGAATTAGCTCAGTTGGTAGAGCA	ND	ND	Cas3_0_I,Cas3_0_I,Cas3_0_I,Cas3_0_I,Cas3_0_I	1655051	1655153	103
DRD-194	NZ_JAMRWX010000001.1	1	1	25	CCGAATTAGCTCAGTTGGTAGAGCA	ND	ND	Cas3_0_I,Cas3_0_I,Cas3_0_I,Cas3_0_I,Cas3_0_I	313068	313170	103
DRD-39	NZ_JAMRXF010000002.1	4	1	39	CRT results	ND	ND	Cas3_0_I	259664	260155	492
DRD-39	NZ_JAMRXF010000003.1	1	1	25	CCGAATTAGCTCAGTTGGTAGAGCA	ND	ND	Cas3_0_I,Cas3_0_I,Cas3_0_I,Cas3_0_I	313187	313289	103
FDAARGOS_414	NZ_CP023501.1	1	1	25	TGCTCTACCAACTGAGCTAAGTCGG	ND	ND	Cas3_0_I,Cas3_0_I,Cas3_0_I,Cas3_0_I,Cas3_0_I	1525501	1525603	103
MGYG-HGUT-01340	NZ_CABKOP010000012.1	1	1	35	CRT results	ND	ND	Cas3_0_I	127251	127345	95
MGYG-HGUT-01340	NZ_CABKOP010000012.1	3	1	35	CRT results	ND	ND	Cas3_0_I	127354	127568	215
MGYG-HGUT-01340	NZ_CABKOP010000009.1	1	1	25	TGCTCTACCAACTGAGCTAAGTCGG	ND	ND	Cas3_0_I	278549	278651	103
N43	NZ_SDQP01000002.1	5	1	35	CRT results	ND	ND	Cas3_0_I	110133	110467	335
N43	NZ_SDQP01000003.1	1	1	25	CCGAATTAGCTCAGTTGGTAGAGCA	ND	ND	Cas3_0_I	304	406	103
SJ21-9	NODE_1_length_769237_cov_58.203461	9	1	29	CRT results	ND	ND	Cas3_0_I,Cas4_0_I-II	658507	659075	569
SJ21-9	NODE_2_length_269727_cov_65.390679	1	1	23	CRT results	ND	ND	Cas3_0_I	175528	175607	80
SJ27-4	NODE_3_length_199364_cov_66.680807	8	1	29	CRT results	ND	ND	Cas3_0_I	71193	71701	509
SJ27-4	NODE_6_length_152846_cov_78.444889	1	1	23	CRT results	ND	ND	Cas3_0_I	32890	32969	80
SJ27-5	NODE_6_length_152846_cov_68.751098	1	1	23	CRT results	ND	ND	Cas3_0_I	119878	119957	80
SJ27-5	NODE_3_length_199364_cov_56.383071	8	1	35	CRT results	ND	ND	Cas3_0_I	127676	128190	515
STCH-BD1	NZ_CP065046.1	1	1	25	TGCTCTACCAACTGAGCTAAGTCGG	ND	ND	Cas3_0_I,Cas3_0_I,Cas3_0_I,Cas3_0_I,Cas3_0_I	739900	740002	103
TR212	NZ_QFDF01000003.1	1	1	25	TGCTCTACCAACTGAGCTAAGTCGG	ND	ND	Cas3_0_I	319663	319765	103
TR212	NZ_QFDF01000001.1	1	1	35	CRT results	ND	ND	Cas3_0_I	110080	110174	95
TR212	NZ_QFDF01000001.1	5	1	35	CRT results	ND	ND	Cas3_0_I	110183	110517	335
W31	W31_dnaA_pilon	1	1	25	ccgaattagctcagttggtagagca	ND	ND	Cas3_0_I,Cas3_0_I,Cas3_0_I,Cas3_0_I,Cas3_0_I	122282	122384	103
WpK4	NZ_SGAX01000001.1	1	1	25	TGCTCTACCAACTGAGCTAAGTCGG	ND	ND	Cas3_0_I,Cas3_0_I,Cas3_0_I,Cas3_0_I,Cas3_0_I	1475496	1475598	103
