# Supplementary material for: Comparative genomics of 40 Weissella paramesenteroides strains
Source: Front Microbiol. 2023 Mar 31;14:1128028. doi: 10.3389/fmicb.2023.1128028 (PMC10102382; doi:10.3389/fmicb.2023.1128028)
Supplement: Supplementary file 8 [file Table_6.xlsx]

## Sheet: Sheet1
Supplementary Table 6. Annotation of all open reading frames in the genomic region responsible for the bacteriocin production, predicted by Bagel4 and manually confirmed using blastp.
orf	annotation	sequence	size
orf01	LytTR family DNA-binding domain-containing protein	LFFLYVTNDEGIRLGKYIRKKLPAANLVFIAACEEPLSSILKHRLAPLDYIFDLTNDDLVEEAIRKDINIALKRTVDHMYNNPEKFVYKLQNCYYDVPMSEILYIASKPNYVNRVILYTKNAAIELNDSLSNIEKRHPTLFRSHKGFIVNLSAVNYVDVQANRIYFRSHEDLFCPISVRKKQRFKEIWRQEKL	193
orf02	hypothetical protein	MIFSNKYSRLIPLHLLLFIVSCRVPDLIKTDQFLLEESFRTYGALAIVIYMEVRTYRKINNSLG	64
orf03	Blp family class II bacteriocin	MENQYQVLTIDEMATIVGGKGKKKNWSKCYAGTIGSAMLGATGGPVTYIGGALVGYATFCQ	61
orf04	hypothetical protein	MHEAIKMLDSYETMNSQELMVISGGLNKVAYDIGHKLGIVVNVYSTVSGIRRGGNFKRRH	60
orf05	hypothetical protein	MDKFVYENYKAVSEAELVNISGGAKHPVRQWLWHKAGDPVVSFGKGFLKAFG	52
orf06	CPBP family intramembrane metalloprotease/putative bacteriocin immunity proteins	MNLVKITYKVVLSYFFIIPFSFYCAVTVPYVGLLTSFLGGIISLLLMFGSQQVFLLLKPMNKPFLWQMVRLLVLAFLIRLVLVWIMVMFDFQNTDNVIGNGYITQLVHADIVTKLILLVLLLIEMTGEELLLASVILPMLSYLKKWNYSWIFSVFIGSLLFSLMHLYAYDFNICFCVIAGLSHIPMIQAWKVTNSLRGGIYIHIFYNMISIFPALLL	217
orf07	peptide cleavage/export ABC transporter	MVGEFCVIMKKINYIPQVDESDCGVAALAMILSNYGTKLSLAKLRNMAKTNTEGTTALGIVYTAQNLNFTAVSIRADLNLYNKKDIPYPFIAHVIKKEKYPHYYVVYGAKGDKLLIADPDSTVGKIKMTKAHFNKEWTGVSIFIAPNVSYKPVKEKKQSLGSLAFIIFRQKLLMINIIVAALLVTLVSVFGTYYLQTIIDVYIPNNMKNTLGVVSLGLIFAYVIQQLLSYARDYLLIVLGQRLSIDIILSYIKHIFELPMSFFSTRRMGEIVSRFTDANTIIEALASTMISIFLDLGILVIIGTVLAIQNTTLFLISLLAIPAYFLVIWLFMRPFSKLNNNQMEAGSMLSSSIIEDVNGIETIKALNSEAVAYRKIDHEFIAYLEKAFLYSKTEAIQNA…	723
orf08	bacteriocin secretion accessory protein	MVEYQDLESGEFYQRRYRNFPTLIIFPTLLLIVFIVLFSFFLKREIIAKFSGAIIPEKIITDVQSTSDNMICTNQLEENKVVNKGDILVTFKNENEKSEIQNGHKKIISHKEHLRSLNVYKRSIIDGRNQFNGVDKFGYDRLFHGYISQINNLNNEFEQQQIDKKIANQQLNEQIDVLRKIQRNNQNKISDFKSIMDAVTKSTKMDADNQYKFIYDDYYAQFKSTQIMSEKVQIKENMISSILQKIEQLQATNDSYDIQIAGVLKNNFLSKNSTLDKITNLQQQQLATIQKEINKQQQILDELEVKQSMANQHYQDTVLKSPKKGILHLINNKSRMTYLPKGTTIAQIYPLLTRKTKLNIESYIAEKDITGLKKGQKIKFIVKQNGSKILKLKGTVKTI…	461
orf09	hypothetical protein	MIKNSGYVLVVIACLITLSPLLYMLDNIFTFLIVQSYGPILLLGLGLAFVFGNQDWPNNVVPVGSISLLFSLFADLLSIYLQPQINALAHYSSTQNLIVSVSEPTLSGIIMILIFDFFVTYGVSFVFVFVANNFFGFKNKVVGN	144
orf10	YihY/virulence factor BrkB family protein	VPILMSVGAVASLVGIDANELVTLLSQHLPSNIMTILEPIIESVLKGGIGILSFSILTTLWAASSVLAIIRKSFNTIYDVPERVSGLFTRVFSFLWLLVILVSAGLIMIVSAVLPAIIAAIPGIQWLEIITQQRWLITLIGLWLIICALNETMPAKRVPFKPLIIGSGIEVVLIIFVNYFFGWYAQFTVKNAGFYQSLGSLLVLIVYLNLIGTMLVVGQIVIAWLDGLFLTTLNPVDEVPKDAKRISAKQSSVNPGKKIMHRHQRRR	267
orf11	NAD-dependent succinate-semialdehyde dehydrogenase	MTYKTTYPYTGEVLQTYDDATAADLEKALTVGHDLYKSWRHTSVKERADILAKIADAIIAHKQELAQAMTYDMGKLLTEAEGEVDLCASIVSYYAEKGEEFMADTPLETPAGNAHYIKQSTGIIVAVEPWNFPLYQVVRVFAPNFIVGNPIILKHASICPKSAQLFADIVLEAGAPEGALNNLFIDYDLVSKAIHDPRVAGVCLTGSERGGAAVAKEAGEALKKSTLELGGNDAFIILDDADWDEVKAVAPGARLYNAGQVCTSSKRFIVMADKYDEFVDVLKDSFSKAKVGDPMDPATDVAPLSSKSAQEKLQKQVQTAIDGGATLVYRQDPVGGDGFFFEPTILTDITKDNPIYNQEMFGPVASVYKVNSEEEAIALANDSSYGLGNTIFSSDIEHA…	456
orf12	hypothetical protein	MKKHITELLTLIEQNANSSETKADPELDALFKKFNSQKNHNLNKALIDLKTNINLYQLEHNYQTPKFLTRIVLNISEVNNVNDGVGIGAFFSNLWFGH	98
orf13	leucocin A/sakacin P family class II bacteriocin	MNHKLYSFAIIDDDELINIIGGENSWHYWGNGVYTNGNKVRTDWHQAWRSVGRISYKSWANGLAHIR	67
orf14	tRNA-dihydrouridine synthase family protein	MVQTKSPYWQKVVDDAQKHPAVPGLEKIPFFTMAPMEAVTDSVFRRVVAKAGGPDVYFTEFTNARSITHPKAKFTVQGRLSVAESEKMPVAQLWGNRPEDFEAAGYDLKERGYEAFDLNMGCPAATVVKNGGGSDLIRHFEDAKNIIAASKAAGLTVSVKTRLGFNQIDTFDEWIPFLLKQDIPLLTVHMRTRKEMSKVPAHYEYIDRLLQLRDEIAPHTLIQINGDIKDREAGLELVRQHPGIDGIMIGRGIFENPFAFEITPREHTLDETLALLRMQLDLYDQFTSEFGPMHFQKLKRFFKIYVRHFSYASDLRVALMDTTNTTQVRELLDQFDEQWAAQKAADTIAITTK	353
orf15	putative sulfate exporter family transporter	MVAGIVLTLVLALVAKLLSPFLPTLGAEALAMLAGIVLGNTVFANQRWGAGVKWAEKYPIEIGIALLGLNVTLQNMESLGWSGVIFILLQMLLTILFVMWIGGRVFKVSPQSAMMMGAGNAVCGSSAIASVAPAVGATDDQRRTSVATVSLAGVVLLFVLPVIGPAILPNNMMVSALIGGTVQSVGQVAGTASLVGGSVVTYAPIFKMLRVIMLSVVVIFMANHASKLSTQAAATTSAKASKKAKISIPWFVTVFIIFMLINSFVTLPHVLTNSAEQVTSFFGVVNLAGIGLNLKWSTIKSSGAKFLGYGLVTIIFQVAIAIALIYVLMG	330
orf16	3'-5' exonuclease	MLFTDLENYVVFDLEMNGSNQIIEIGALKITGTKNIEKFSVIVNNPPIGSAMKSFKYITKAMGSKGGWITLDMIHHGISEERALNRFMRFVGDYAVVGHAIVDGDVQLIKEGLQHNNLGKWDTRGKLYDTQQIHGAITGNPQDISLKDLAELYQVDVGEQKHRALPDSKETLAIFLAMKKAWR	183
orf17	GNAT family N-acetyltransferase	MLMYTRPAQMKDFPEIWAAFQDGVAYLGEQGASQWQGEGAPNEALFKSDIENGWGIVLIYDGQVAGYGSLVPGPEDEYEILQGEWVGEEPEYVAIHRVTINSNIRGKGVGKTLTRDLVNLARARGYRDIRIDTFPENVIMQNVIKKTAFTYRGMVPFEYGDRLGYQLLVD	170
orf18	amino acid permease	MFQKESLNTYMSSDGNFEKTLNAKDLMALGIGAVIGSGIFVLPGTVAATTTGPAIIFSFILAALVSSLVAMAYSEMSTAMPVAGSAYSYGNVIFGEVIGWVLGWALILEYMLSVSAVSTGWSAYFANLISPLVKIPTALSGAYDPANGTYVNIVAVVIVLLIGLLLRGGLRQSKRVENALVVLKLVIILAFIIIGIFFIKSSNYHPLIPERINGAFGWQGIITGTSMVFFAFLGFDALSASAAEVKNPKRNMPIGIIGTLIVAAVLYGVMGLVLTGMVHYSKLNVADPAAFALQQVGQNWASLIITIGALIGMATMMYTMTYAASRLIYAVGRDGLLPGGVGKVNKQGNPNRALTVATVVIAIFSGLVPLDKLVDLVNVGTLLAFVVVSIGILPLRHRQ…	460
orf19	MFS transporter	VLLLIVNGIYKIGASVLEKEKTNKGMVTFALFIATFLSAIEGTIVSTAMPTIVGELQGISIMNWVFSIFLMMSTLTTPIYGKLADNIGRKPVFISGLIIFLAGSVLSGLSASMPQLIFWRAIQGIGAGAVLPISNTIIADIYPPEKRAQIMGINNSAWGIASVAAPLLGGLIVDNFSWRWVFFINLPFGVLSMILIVVFLKESARVGHSRLDIWGIVWLSVSISGLLYGVELINKTTINWIAVVVVFAVAIIGLILFIRQEKRAADPIILLDLFKNPTFAIQNFAVGMMSVFLIAFDVYIPSWTQGILGLPATLAGFATTPSSLFWIVGSFFAGKMLSRIRPQQILMISMGLLVVGGTVMTLLPANVSFYVFLFMGIFLGLGFGITVTGSTIISQSVVA…	506
orf20	PTS sugar transporter subunit IIA	MILFSVRQKQILLTLLNETAGISLKEMEKQLHVSRRTLYREFSNIRLFLEQNNLILTSYNGRYLLEGSDDNKTALKDSLIDQHSVYEMPTAQRQNAVAAYLLLTNETTKILSIASELNVSEGTIQHDLLTLADSLSEYYLVIEKKKGVGVQIVGDEIKRRQVLCGILLTEINGYSLLRYLNNHDLTTKNYFMSLLPYDLLFECNRNLTDHVFSQINFYSDRQRISTILMFAITIFRFTYNNEISQLPKFGENLEYLGITYKFFANFQWHPIDDAPQVTQKEAIFLAQQLQNAHLNTHSLAFDTEDFSVMIQVRELVELVSLSYGWDFRRNPYFFKRLSKHIENMIRHEQDLLPNVQIETLQQISSKYSRLFKTIQEKWLEIFPDKKLTTPESQLLLLYF…	688
