# Supplementary material for: Comparative genomics of 40 Weissella paramesenteroides strains
Source: Front Microbiol. 2023 Mar 31;14:1128028. doi: 10.3389/fmicb.2023.1128028 (PMC10102382; doi:10.3389/fmicb.2023.1128028)
Supplement: Supplementary file 9 [file Table_7.xlsx]

## Sheet: Sheet1
Supplementary Table 7. Antibiotic resistance genes in all 42 W. paramesenteroides genomes, predicted by RGI online tool. The mefF and msrG carrying strains are marked in blue; qacJ carrying strains are in yellow.
Filename	RGI Criteria	# Perfect Hits	# Strict Hits	# Loose Hits
W31	Perfect, Strict, complete genes only	0	1	0
RGI	ARO Term	SNP	Detection	AMR	Drug	Resistance	% Identity of Matching Region	% Length of Reference Sequence
Criteria			Criteria	Gene Family	Class	Mechanism
Strict	vanT gene in vanG cluster		protein homolog model	glycopeptide resistance gene cluster, vanT	glycopeptide antibiotic	antibiotic target alteration	34.05	71.07
Filename	RGI Criteria	# Perfect Hits	# Strict Hits	# Loose Hits
SJ27-5	Perfect, Strict, complete genes only	1	2	0
RGI	ARO Term	SNP	Detection	AMR	Drug	Resistance	% Identity of Matching Region	% Length of Reference Sequence
Criteria			Criteria	Gene Family	Class	Mechanism
Perfect	mefF		protein homolog model	major facilitator superfamily (MFS) antibiotic efflux pump	macrolide antibiotic	antibiotic efflux	100	100
Strict	vanT gene in vanG cluster		protein homolog model	glycopeptide resistance gene cluster, vanT	glycopeptide antibiotic	antibiotic target alteration	33.78	73.31
Strict	msr(G)		protein homolog model	msr-type ABC-F protein	macrolide antibiotic, streptogramin antibiotic	antibiotic target protection	99.79	100
Filename	RGI Criteria	# Perfect Hits	# Strict Hits	# Loose Hits
SJ27-4	Perfect, Strict, complete genes only	1	2	0
RGI	ARO Term	SNP	Detection	AMR	Drug	Resistance	% Identity of Matching Region	% Length of Reference Sequence
Criteria			Criteria	Gene Family	Class	Mechanism
Perfect	mefF		protein homolog model	major facilitator superfamily (MFS) antibiotic efflux pump	macrolide antibiotic	antibiotic efflux	100	100
Strict	vanT gene in vanG cluster		protein homolog model	glycopeptide resistance gene cluster, vanT	glycopeptide antibiotic	antibiotic target alteration	33.78	73.31
Strict	msr(G)		protein homolog model	msr-type ABC-F protein	macrolide antibiotic, streptogramin antibiotic	antibiotic target protection	99.79	100
Filename	RGI Criteria	# Perfect Hits	# Strict Hits	# Loose Hits
SJ21-9	Perfect, Strict, complete genes only	1	2	0
RGI	ARO Term	SNP	Detection	AMR	Drug	Resistance	% Identity of Matching Region	% Length of Reference Sequence
Criteria			Criteria	Gene Family	Class	Mechanism
Perfect	mefF		protein homolog model	major facilitator superfamily (MFS) antibiotic efflux pump	macrolide antibiotic	antibiotic efflux	100	100
Strict	vanT gene in vanG cluster		protein homolog model	glycopeptide resistance gene cluster, vanT	glycopeptide antibiotic	antibiotic target alteration	34.05	73.31
Strict	msr(G)		protein homolog model	msr-type ABC-F protein	macrolide antibiotic, streptogramin antibiotic	antibiotic target protection	99.79	100
Filename	RGI Criteria	# Perfect Hits	# Strict Hits	# Loose Hits
C8	Perfect, Strict, complete genes only	0	1	0
RGI	ARO Term	SNP	Detection	AMR	Drug	Resistance	% Identity of Matching Region	% Length of Reference Sequence
Criteria			Criteria	Gene Family	Class	Mechanism
Strict	vanT gene in vanG cluster		protein homolog model	glycopeptide resistance gene cluster, vanT	glycopeptide antibiotic	antibiotic target alteration	34.05	73.31
Filename	RGI Criteria	# Perfect Hits	# Strict Hits	# Loose Hits
B1	Perfect, Strict, complete genes only	0	1	0
RGI	ARO Term	SNP	Detection	AMR	Drug	Resistance	% Identity of Matching Region	% Length of Reference Sequence
Criteria			Criteria	Gene Family	Class	Mechanism
Strict	vanT gene in vanG cluster		protein homolog model	glycopeptide resistance gene cluster, vanT	glycopeptide antibiotic	antibiotic target alteration	34.05	73.31
Filename	RGI Criteria	# Perfect Hits	# Strict Hits	# Loose Hits
DmW_107106	Perfect, Strict, complete genes only	0	1	0
RGI	ARO Term	SNP	Detection	AMR	Drug	Resistance	% Identity of Matching Region	% Length of Reference Sequence
Criteria			Criteria	Gene Family	Class	Mechanism
Strict	vanT gene in vanG cluster		protein homolog model	glycopeptide resistance gene cluster, vanT	glycopeptide antibiotic	antibiotic target alteration	33.51	73.31
Filename	RGI Criteria	# Perfect Hits	# Strict Hits	# Loose Hits
DmW_107100	Perfect, Strict, complete genes only	0	1	0
RGI	ARO Term	SNP	Detection	AMR	Drug	Resistance	% Identity of Matching Region	% Length of Reference Sequence
Criteria			Criteria	Gene Family	Class	Mechanism
Strict	vanT gene in vanG cluster		protein homolog model	glycopeptide resistance gene cluster, vanT	glycopeptide antibiotic	antibiotic target alteration	33.51	73.31
Filename	RGI Criteria	# Perfect Hits	# Strict Hits	# Loose Hits
DmW_107099	Perfect, Strict, complete genes only	0	1	0
RGI	ARO Term	SNP	Detection	AMR	Drug	Resistance	% Identity of Matching Region	% Length of Reference Sequence
Criteria			Criteria	Gene Family	Class	Mechanism
Strict	vanT gene in vanG cluster		protein homolog model	glycopeptide resistance gene cluster, vanT	glycopeptide antibiotic	antibiotic target alteration	33.51	73.31
Filename	RGI Criteria	# Perfect Hits	# Strict Hits	# Loose Hits
DmW_107	Perfect, Strict, complete genes only	0	1	0
RGI	ARO Term	SNP	Detection	AMR	Drug	Resistance	% Identity of Matching Region	% Length of Reference Sequence
Criteria			Criteria	Gene Family	Class	Mechanism
Strict	vanT gene in vanG cluster		protein homolog model	glycopeptide resistance gene cluster, vanT	glycopeptide antibiotic	antibiotic target alteration	33.51	73.31
Filename	RGI Criteria	# Perfect Hits	# Strict Hits	# Loose Hits
DmW_107102	Perfect, Strict, complete genes only	0	1	0
RGI	ARO Term	SNP	Detection	AMR	Drug	Resistance	% Identity of Matching Region	% Length of Reference Sequence
Criteria			Criteria	Gene Family	Class	Mechanism
Strict	vanT gene in vanG cluster		protein homolog model	glycopeptide resistance gene cluster, vanT	glycopeptide antibiotic	antibiotic target alteration	33.51	73.31
Filename	RGI Criteria	# Perfect Hits	# Strict Hits	# Loose Hits
DmW_107101	Perfect, Strict, complete genes only	0	1	0
RGI	ARO Term	SNP	Detection	AMR	Drug	Resistance	% Identity of Matching Region	% Length of Reference Sequence
Criteria			Criteria	Gene Family	Class	Mechanism
Strict	vanT gene in vanG cluster		protein homolog model	glycopeptide resistance gene cluster, vanT	glycopeptide antibiotic	antibiotic target alteration	33.51	73.31
Filename	RGI Criteria	# Perfect Hits	# Strict Hits	# Loose Hits
DmW_107105	Perfect, Strict, complete genes only	0	1	0
RGI	ARO Term	SNP	Detection	AMR	Drug	Resistance	% Identity of Matching Region	% Length of Reference Sequence
Criteria			Criteria	Gene Family	Class	Mechanism
Strict	vanT gene in vanG cluster		protein homolog model	glycopeptide resistance gene cluster, vanT	glycopeptide antibiotic	antibiotic target alteration	33.51	73.31
Filename	RGI Criteria	# Perfect Hits	# Strict Hits	# Loose Hits
DmW_107108	Perfect, Strict, complete genes only	0	1	0
RGI	ARO Term	SNP	Detection	AMR	Drug	Resistance	% Identity of Matching Region	% Length of Reference Sequence
Criteria			Criteria	Gene Family	Class	Mechanism
Strict	vanT gene in vanG cluster		protein homolog model	glycopeptide resistance gene cluster, vanT	glycopeptide antibiotic	antibiotic target alteration	33.51	73.31
Filename	RGI Criteria	# Perfect Hits	# Strict Hits	# Loose Hits
DmW_107104	Perfect, Strict, complete genes only	0	1	0
RGI	ARO Term	SNP	Detection	AMR	Drug	Resistance	% Identity of Matching Region	% Length of Reference Sequence
Criteria			Criteria	Gene Family	Class	Mechanism
Strict	vanT gene in vanG cluster		protein homolog model	glycopeptide resistance gene cluster, vanT	glycopeptide antibiotic	antibiotic target alteration	33.51	73.31
Filename	RGI Criteria	# Perfect Hits	# Strict Hits	# Loose Hits
DmW_109110	Perfect, Strict, complete genes only	0	1	0
RGI	ARO Term	SNP	Detection	AMR	Drug	Resistance	% Identity of Matching Region	% Length of Reference Sequence
Criteria			Criteria	Gene Family	Class	Mechanism
Strict	vanT gene in vanG cluster		protein homolog model	glycopeptide resistance gene cluster, vanT	glycopeptide antibiotic	antibiotic target alteration	34.05	73.31
Filename	RGI Criteria	# Perfect Hits	# Strict Hits	# Loose Hits
DmW_109	Perfect, Strict, complete genes only	0	1	0
RGI	ARO Term	SNP	Detection	AMR	Drug	Resistance	% Identity of Matching Region	% Length of Reference Sequence
Criteria			Criteria	Gene Family	Class	Mechanism
Strict	vanT gene in vanG cluster		protein homolog model	glycopeptide resistance gene cluster, vanT	glycopeptide antibiotic	antibiotic target alteration	34.05	73.31
Filename	RGI Criteria	# Perfect Hits	# Strict Hits	# Loose Hits
DmW_115116	Perfect, Strict, complete genes only	0	1	0
RGI	ARO Term	SNP	Detection	AMR	Drug	Resistance	% Identity of Matching Region	% Length of Reference Sequence
Criteria			Criteria	Gene Family	Class	Mechanism
Strict	vanT gene in vanG cluster		protein homolog model	glycopeptide resistance gene cluster, vanT	glycopeptide antibiotic	antibiotic target alteration	33.51	73.31
Filename	RGI Criteria	# Perfect Hits	# Strict Hits	# Loose Hits
DmW_115	Perfect, Strict, complete genes only	0	1	0
RGI	ARO Term	SNP	Detection	AMR	Drug	Resistance	% Identity of Matching Region	% Length of Reference Sequence
Criteria			Criteria	Gene Family	Class	Mechanism
Strict	vanT gene in vanG cluster		protein homolog model	glycopeptide resistance gene cluster, vanT	glycopeptide antibiotic	antibiotic target alteration	33.51	73.31
Filename	RGI Criteria	# Perfect Hits	# Strict Hits	# Loose Hits
DmW_115112	Perfect, Strict, complete genes only	0	1	0
RGI	ARO Term	SNP	Detection	AMR	Drug	Resistance	% Identity of Matching Region	% Length of Reference Sequence
Criteria			Criteria	Gene Family	Class	Mechanism
Strict	vanT gene in vanG cluster		protein homolog model	glycopeptide resistance gene cluster, vanT	glycopeptide antibiotic	antibiotic target alteration	33.51	73.31
Filename	RGI Criteria	# Perfect Hits	# Strict Hits	# Loose Hits
DmW_115113	Perfect, Strict, complete genes only	0	1	0
RGI	ARO Term	SNP	Detection	AMR	Drug	Resistance	% Identity of Matching Region	% Length of Reference Sequence
Criteria			Criteria	Gene Family	Class	Mechanism
Strict	vanT gene in vanG cluster		protein homolog model	glycopeptide resistance gene cluster, vanT	glycopeptide antibiotic	antibiotic target alteration	33.51	73.31
Filename	RGI Criteria	# Perfect Hits	# Strict Hits	# Loose Hits
DmW_115114	Perfect, Strict, complete genes only	0	1	0
RGI	ARO Term	SNP	Detection	AMR	Drug	Resistance	% Identity of Matching Region	% Length of Reference Sequence
Criteria			Criteria	Gene Family	Class	Mechanism
Strict	vanT gene in vanG cluster		protein homolog model	glycopeptide resistance gene cluster, vanT	glycopeptide antibiotic	antibiotic target alteration	33.51	73.31
Filename	RGI Criteria	# Perfect Hits	# Strict Hits	# Loose Hits
DmW_118119	Perfect, Strict, complete genes only	0	2	0
RGI	ARO Term	SNP	Detection	AMR	Drug	Resistance	% Identity of Matching Region	% Length of Reference Sequence
Criteria			Criteria	Gene Family	Class	Mechanism
Strict	vanT gene in vanG cluster		protein homolog model	glycopeptide resistance gene cluster, vanT	glycopeptide antibiotic	antibiotic target alteration	32.41	70.93
Strict	qacJ		protein homolog model	small multidrug resistance (SMR) antibiotic efflux pump	disinfecting agents and antiseptics	antibiotic efflux	53.33	101.87
Filename	RGI Criteria	# Perfect Hits	# Strict Hits	# Loose Hits
DmW_118	Perfect, Strict, complete genes only	0	2	0
RGI	ARO Term	SNP	Detection	AMR	Drug	Resistance	% Identity of Matching Region	% Length of Reference Sequence
Criteria			Criteria	Gene Family	Class	Mechanism
Strict	qacJ		protein homolog model	small multidrug resistance (SMR) antibiotic efflux pump	disinfecting agents and antiseptics	antibiotic efflux	53.33	101.87
Strict	vanT gene in vanG cluster		protein homolog model	glycopeptide resistance gene cluster, vanT	glycopeptide antibiotic	antibiotic target alteration	32.41	70.93
Filename	RGI Criteria	# Perfect Hits	# Strict Hits	# Loose Hits
TR212	Perfect, Strict, complete genes only	0	1	0
RGI	ARO Term	SNP	Detection	AMR	Drug	Resistance	% Identity of Matching Region	% Length of Reference Sequence
Criteria			Criteria	Gene Family	Class	Mechanism
Strict	vanT gene in vanG cluster		protein homolog model	glycopeptide resistance gene cluster, vanT	glycopeptide antibiotic	antibiotic target alteration	34.05	73.31
Filename	RGI Criteria	# Perfect Hits	# Strict Hits	# Loose Hits
WpK4	Perfect, Strict, complete genes only	0	1	0
RGI	ARO Term	SNP	Detection	AMR	Drug	Resistance	% Identity of Matching Region	% Length of Reference Sequence
Criteria			Criteria	Gene Family	Class	Mechanism
Strict	vanT gene in vanG cluster		protein homolog model	glycopeptide resistance gene cluster, vanT	glycopeptide antibiotic	antibiotic target alteration	34.05	73.31
Filename	RGI Criteria	# Perfect Hits	# Strict Hits	# Loose Hits
FDAARGOS_414	Perfect, Strict, complete genes only	0	1	0
RGI	ARO Term	SNP	Detection	AMR	Drug	Resistance	% Identity of Matching Region	% Length of Reference Sequence
Criteria			Criteria	Gene Family	Class	Mechanism
Strict	vanT gene in vanG cluster		protein homolog model	glycopeptide resistance gene cluster, vanT	glycopeptide antibiotic	antibiotic target alteration	34.05	71.07
Filename	RGI Criteria	# Perfect Hits	# Strict Hits	# Loose Hits
ATCC 33313	Perfect, Strict, complete genes only	0	1	0
RGI	ARO Term	SNP	Detection	AMR	Drug	Resistance	% Identity of Matching Region	% Length of Reference Sequence
Criteria			Criteria	Gene Family	Class	Mechanism
Strict	vanT gene in vanG cluster		protein homolog model	glycopeptide resistance gene cluster, vanT	glycopeptide antibiotic	antibiotic target alteration	34.05	73.31
Filename	RGI Criteria	# Perfect Hits	# Strict Hits	# Loose Hits
3.2.24	Perfect, Strict, complete genes only	0	1	0
RGI	ARO Term	SNP	Detection	AMR	Drug	Resistance	% Identity of Matching Region	% Length of Reference Sequence
Criteria			Criteria	Gene Family	Class	Mechanism
Strict	vanT gene in vanG cluster		protein homolog model	glycopeptide resistance gene cluster, vanT	glycopeptide antibiotic	antibiotic target alteration	34.05	73.31
Filename	RGI Criteria	# Perfect Hits	# Strict Hits	# Loose Hits
STCH-BD1	Perfect, Strict, complete genes only	0	1	0
RGI	ARO Term	SNP	Detection	AMR	Drug	Resistance	% Identity of Matching Region	% Length of Reference Sequence
Criteria			Criteria	Gene Family	Class	Mechanism
Strict	vanT gene in vanG cluster		protein homolog model	glycopeptide resistance gene cluster, vanT	glycopeptide antibiotic	antibiotic target alteration	33.51	71.07
Filename	RGI Criteria	# Perfect Hits	# Strict Hits	# Loose Hits
N43	Perfect, Strict, complete genes only	0	1	0
RGI	ARO Term	SNP	Detection	AMR	Drug	Resistance	% Identity of Matching Region	% Length of Reference Sequence
Criteria			Criteria	Gene Family	Class	Mechanism
Strict	vanT gene in vanG cluster		protein homolog model	glycopeptide resistance gene cluster, vanT	glycopeptide antibiotic	antibiotic target alteration	34.05	73.31
Filename	RGI Criteria	# Perfect Hits	# Strict Hits	# Loose Hits
MGYG-HGUT-01340	Perfect, Strict, complete genes only	0	1	0
RGI	ARO Term	SNP	Detection	AMR	Drug	Resistance	% Identity of Matching Region	% Length of Reference Sequence
Criteria			Criteria	Gene Family	Class	Mechanism
Strict	vanT gene in vanG cluster		protein homolog model	glycopeptide resistance gene cluster, vanT	glycopeptide antibiotic	antibiotic target alteration	34.05	73.31
Filename	RGI Criteria	# Perfect Hits	# Strict Hits	# Loose Hits
A37	Perfect, Strict, complete genes only	0	1	0
RGI	ARO Term	SNP	Detection	AMR	Drug	Resistance	% Identity of Matching Region	% Length of Reference Sequence
Criteria			Criteria	Gene Family	Class	Mechanism
Strict	vanT gene in vanG cluster		protein homolog model	glycopeptide resistance gene cluster, vanT	glycopeptide antibiotic	antibiotic target alteration	34.05	73.31
Filename	RGI Criteria	# Perfect Hits	# Strict Hits	# Loose Hits
DRD-39	Perfect, Strict, complete genes only	0	1	0
RGI	ARO Term	SNP	Detection	AMR	Drug	Resistance	% Identity of Matching Region	% Length of Reference Sequence
Criteria			Criteria	Gene Family	Class	Mechanism
Strict	vanT gene in vanG cluster		protein homolog model	glycopeptide resistance gene cluster, vanT	glycopeptide antibiotic	antibiotic target alteration	33.78	71.07
Filename	RGI Criteria	# Perfect Hits	# Strict Hits	# Loose Hits
DRD-137	Perfect, Strict, complete genes only	0	1	0
RGI	ARO Term	SNP	Detection	AMR	Drug	Resistance	% Identity of Matching Region	% Length of Reference Sequence
Criteria			Criteria	Gene Family	Class	Mechanism
Strict	vanT gene in vanG cluster		protein homolog model	glycopeptide resistance gene cluster, vanT	glycopeptide antibiotic	antibiotic target alteration	33.78	71.07
Filename	RGI Criteria	# Perfect Hits	# Strict Hits	# Loose Hits
DRD-105	Perfect, Strict, complete genes only	0	1	0
RGI	ARO Term	SNP	Detection	AMR	Drug	Resistance	% Identity of Matching Region	% Length of Reference Sequence
Criteria			Criteria	Gene Family	Class	Mechanism
Strict	vanT gene in vanG cluster		protein homolog model	glycopeptide resistance gene cluster, vanT	glycopeptide antibiotic	antibiotic target alteration	33.78	71.07
Filename	RGI Criteria	# Perfect Hits	# Strict Hits	# Loose Hits
DRD-149	Perfect, Strict, complete genes only	0	1	0
RGI	ARO Term	SNP	Detection	AMR	Drug	Resistance	% Identity of Matching Region	% Length of Reference Sequence
Criteria			Criteria	Gene Family	Class	Mechanism
Strict	vanT gene in vanG cluster		protein homolog model	glycopeptide resistance gene cluster, vanT	glycopeptide antibiotic	antibiotic target alteration	33.78	71.07
Filename	RGI Criteria	# Perfect Hits	# Strict Hits	# Loose Hits
DRD-187	Perfect, Strict, complete genes only	0	1	0
RGI	ARO Term	SNP	Detection	AMR	Drug	Resistance	% Identity of Matching Region	% Length of Reference Sequence
Criteria			Criteria	Gene Family	Class	Mechanism
Strict	vanT gene in vanG cluster		protein homolog model	glycopeptide resistance gene cluster, vanT	glycopeptide antibiotic	antibiotic target alteration	33.78	71.07
Filename	RGI Criteria	# Perfect Hits	# Strict Hits	# Loose Hits
DRD-194	Perfect, Strict, complete genes only	0	1	0
RGI	ARO Term	SNP	Detection	AMR	Drug	Resistance	% Identity of Matching Region	% Length of Reference Sequence
Criteria			Criteria	Gene Family	Class	Mechanism
Strict	vanT gene in vanG cluster		protein homolog model	glycopeptide resistance gene cluster, vanT	glycopeptide antibiotic	antibiotic target alteration	33.78	71.07
Filename	RGI Criteria	# Perfect Hits	# Strict Hits	# Loose Hits
DRD-172	Perfect, Strict, complete genes only	0	1	0
RGI	ARO Term	SNP	Detection	AMR	Drug	Resistance	% Identity of Matching Region	% Length of Reference Sequence
Criteria			Criteria	Gene Family	Class	Mechanism
Strict	vanT gene in vanG cluster		protein homolog model	glycopeptide resistance gene cluster, vanT	glycopeptide antibiotic	antibiotic target alteration	33.78	71.07
Filename	RGI Criteria	# Perfect Hits	# Strict Hits	# Loose Hits
DRD-169	Perfect, Strict, complete genes only	0	1	0
RGI	ARO Term	SNP	Detection	AMR	Drug	Resistance	% Identity of Matching Region	% Length of Reference Sequence
Criteria			Criteria	Gene Family	Class	Mechanism
Strict	vanT gene in vanG cluster		protein homolog model	glycopeptide resistance gene cluster, vanT	glycopeptide antibiotic	antibiotic target alteration	33.78	71.07
Filename	RGI Criteria	# Perfect Hits	# Strict Hits	# Loose Hits
DRD-142	Perfect, Strict, complete genes only	0	1	0
RGI	ARO Term	SNP	Detection	AMR	Drug	Resistance	% Identity of Matching Region	% Length of Reference Sequence
Criteria			Criteria	Gene Family	Class	Mechanism
Strict	vanT gene in vanG cluster		protein homolog model	glycopeptide resistance gene cluster, vanT	glycopeptide antibiotic	antibiotic target alteration	33.78	71.07
